# Supplementary material
Source: PubMed Central journal article supplement (PMC4019937)

## Supplementary Materials

to "*Phylogenomic reconstruction of archaeal fatty acid metabolism*"

by Daria V. Dibrova, Michael Y. Galperin, and Armen Y. Mulkidjanian

**Figure S1. Reactions of  $\beta$ -oxidation of fatty acids** (modified from the charts in KEGG and MetaCyc databases).

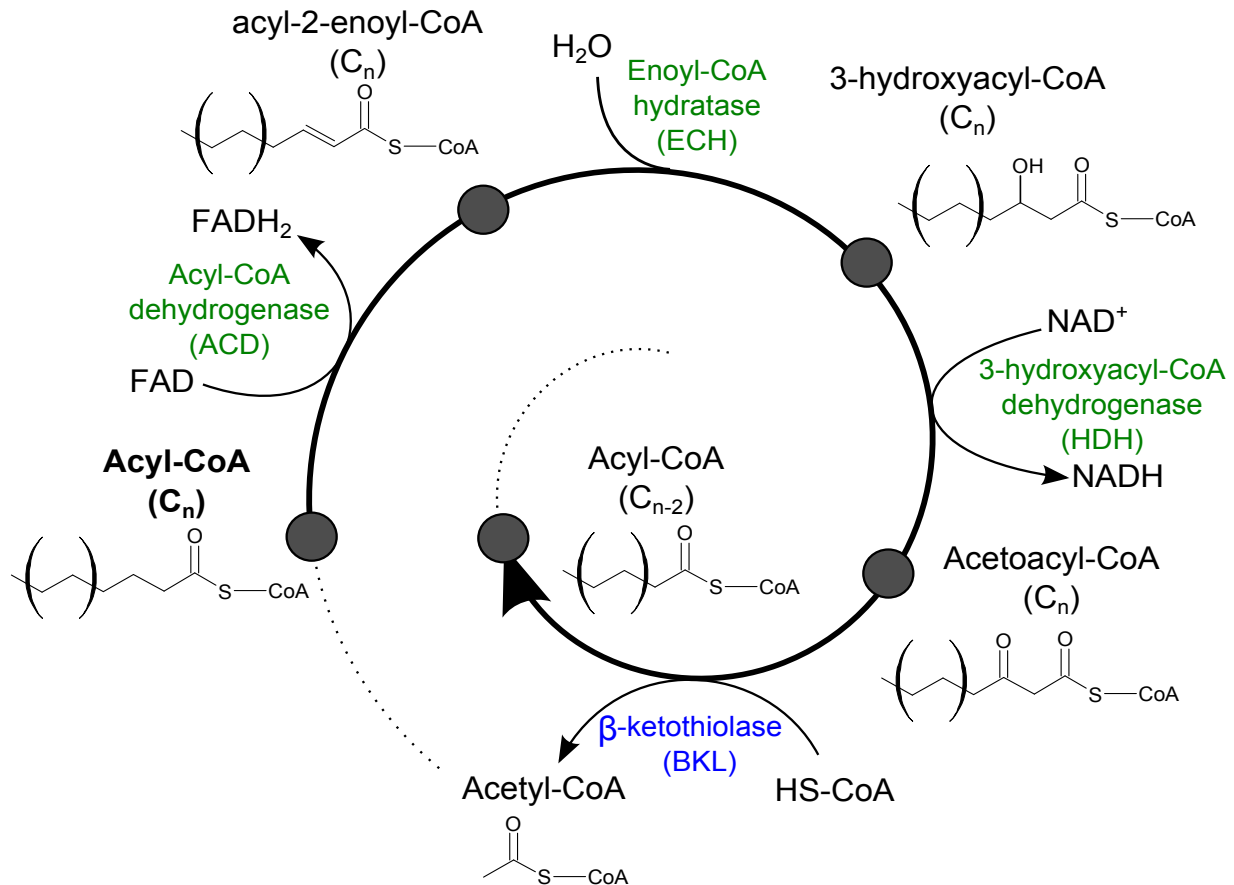

**Figure S2. Phylogenetic tree of  $\beta$ -ketothiolase and its homologs.**

The tree was constructed based on conserved blocks (total 227 positions) from 511 sequences. Each protein sequence on the tree is listed under its gene identifier (gi) in the NCBI's RefSeq database and the name of the source organism. Eukaryotic proteins and clades are marked by bold orange branches. The names of bacterial and archaeal proteins are colored according to their taxonomy, as follows:

**Archaea:**

Crenarchaeota  
Euryarchaeota  
Korarchaeota  
Nanoarchaeota  
Thaumarchaeota

**Well-sampled bacterial phyla\*:**

Actinobacteria  
Aquificae  
Bacteroidetes/Chlorobi group  
Chlamydiae/Verrucomicrobia group  
Chloroflexi  
Cyanobacteria  
Deinococcus-Thermus  
Firmicutes  
Proteobacteria  
Thermotogae

**Poorly sampled bacterial phyla\*:**

Chrysiogenetes  
Deferribacteres  
Dictyoglomi  
Elusimicrobia  
Fibrobacteres/Acidobacteria group  
Fusobacteria  
Gemmatimonadetes  
Nitrospirae  
Planctomycetes  
Spirochaetes  
Synergistetes  
Thermodesulfobacteria  
unclassified Bacteria

\* The terms "poorly sampled" and "well-sampled" refer to the number of full genome sequences available for the respective phyla.

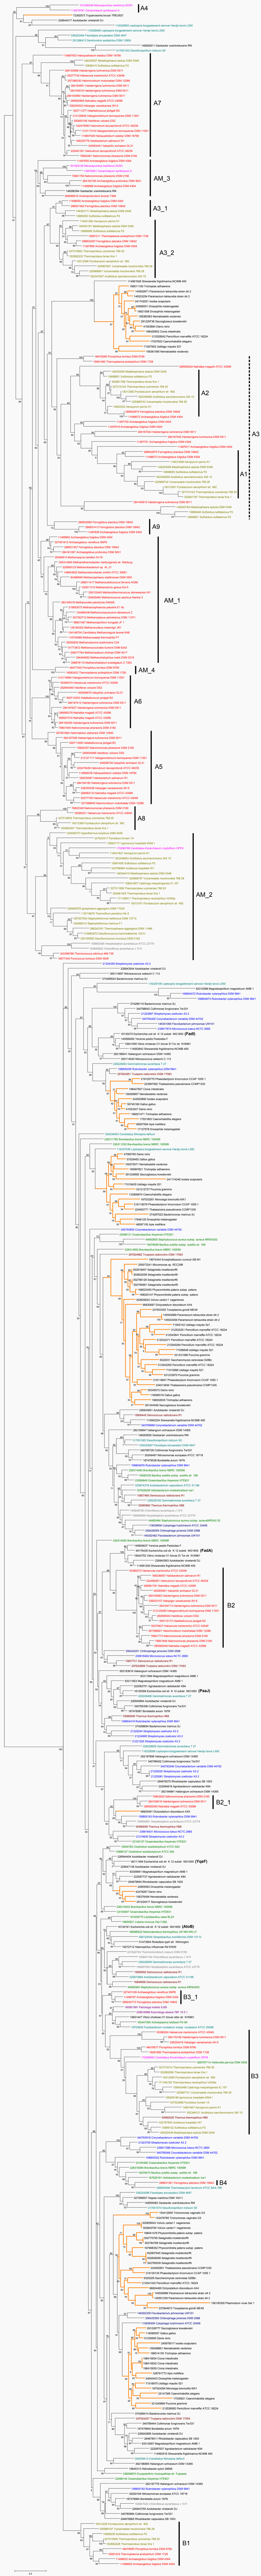

**Figure S3. Reactions of fatty acids biosynthesis in bacteria** (modified from the charts in KEGG and MetaCyc databases). The gene-based enzyme names in *Escherichia coli* and/or *Bacillus subtilis* are in red; the same names are used in the **Table S2**. Abbreviations: ACP, acyl-carrier protein, CoA, coenzyme A.

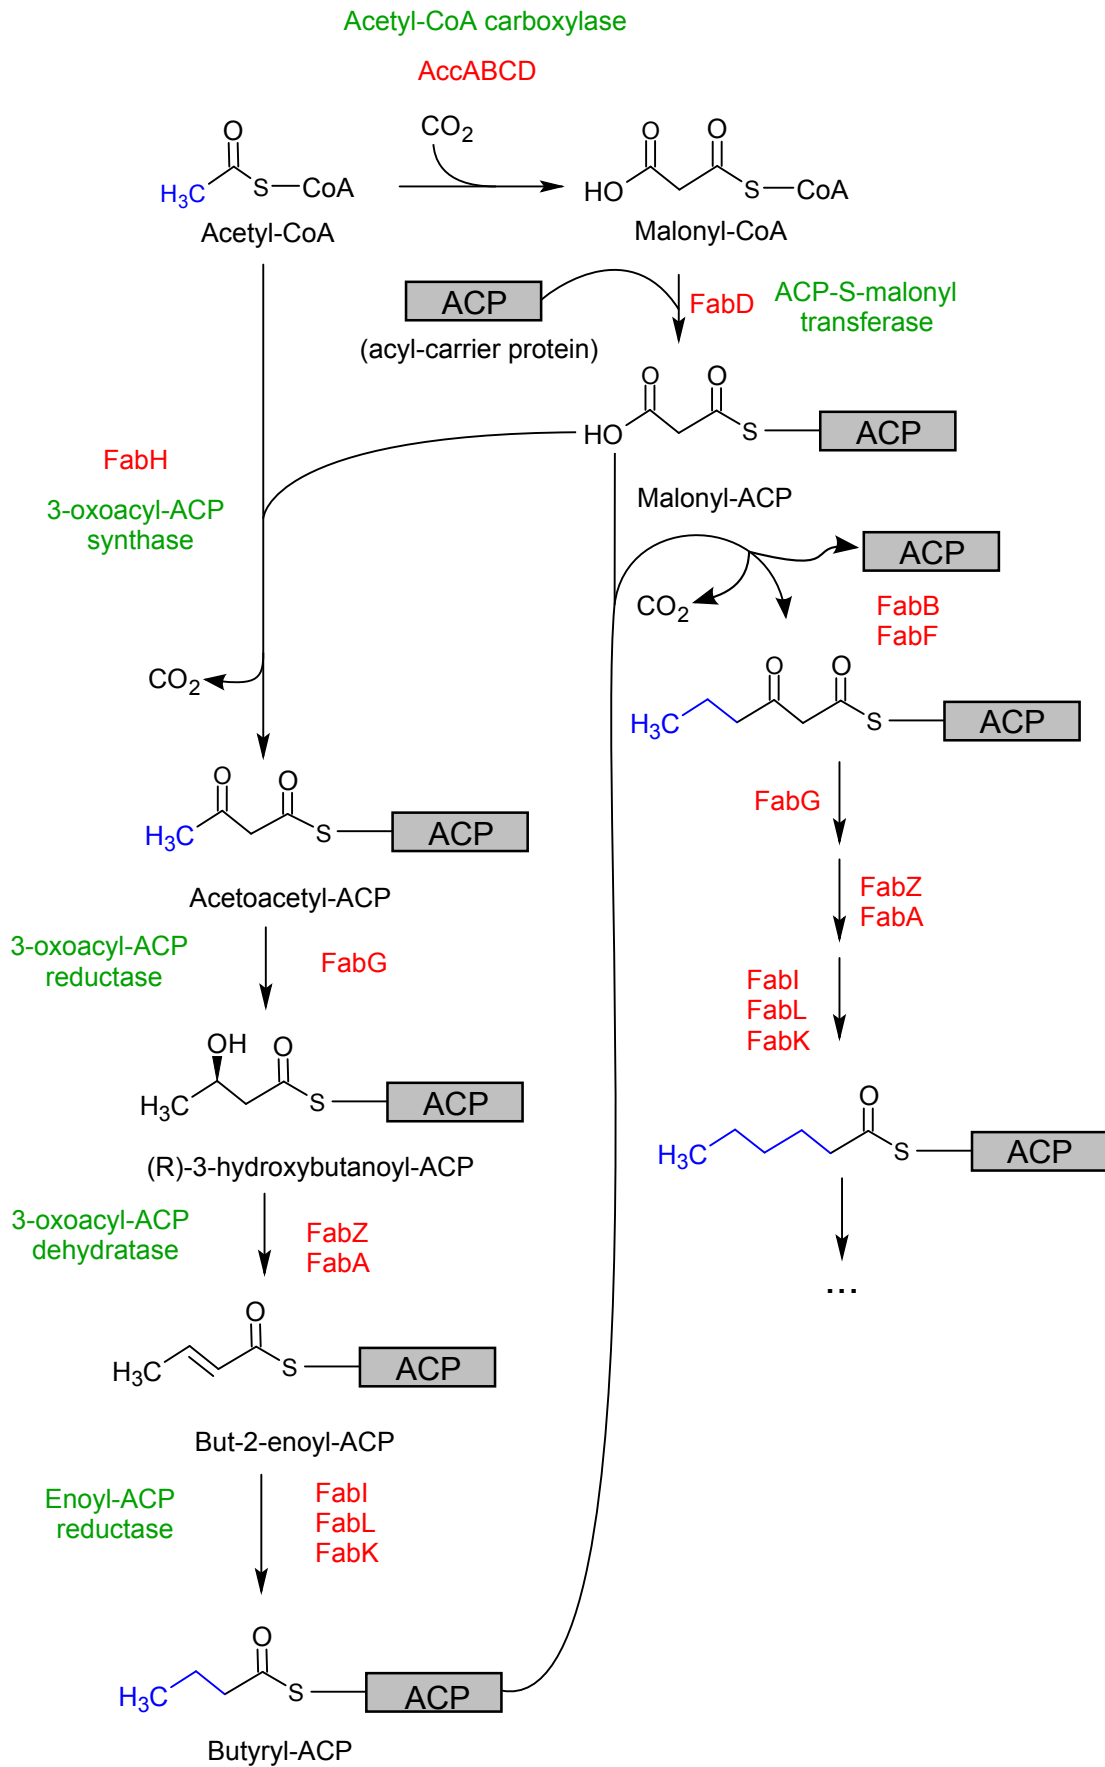

**Figure S4. Phylogenetic tree of the 4-hydroxybutyryl-CoA dehydratase and its homologs (COG2368) from bacteria and archaea.**

The tree was constructed based on conserved blocks (total 227 positions) from 511 sequences. Each protein sequence on the tree is listed under its gene identifier (gi) in the NCBI's RefSeq database and the name of the source organism. The names of bacterial and archaeal proteins are colored as in Fig. S2.

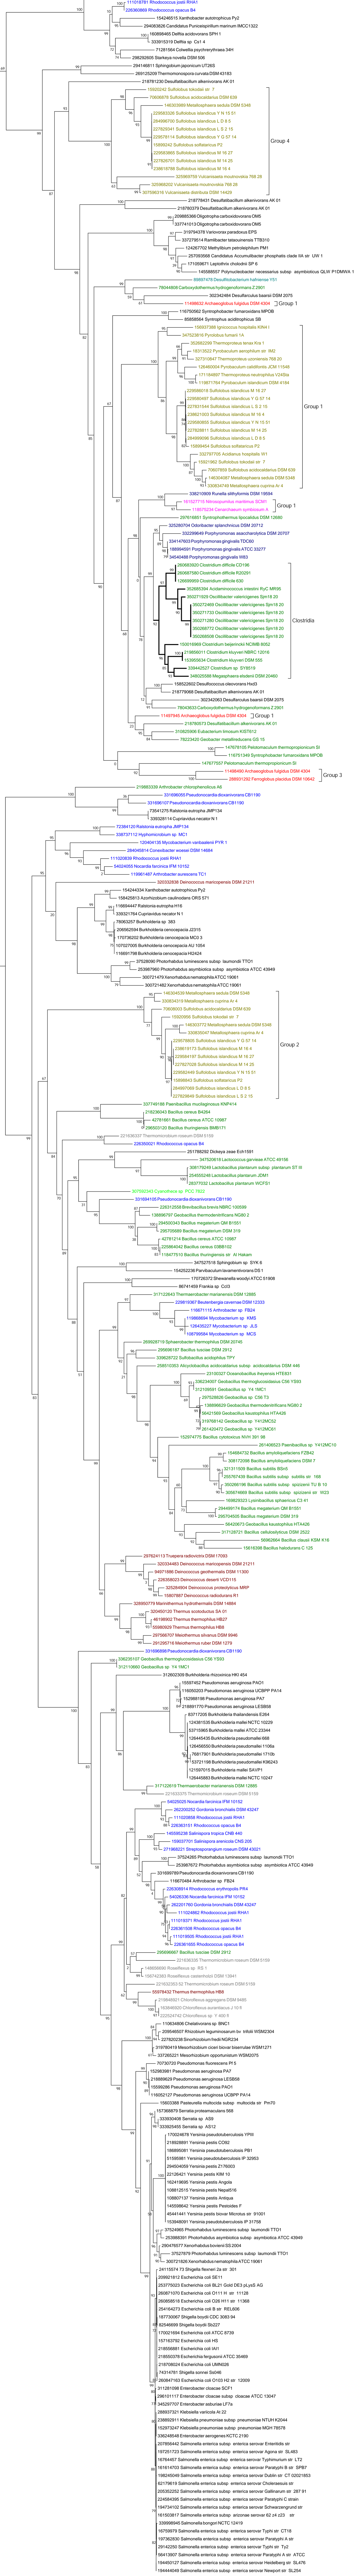

Supplement: NIHMS554260-supplement-Supp_Fig_S1-S4.pdf [file NIHMS554260-supplement-Supp_Fig_S1-S4.pdf]
